# Supplementary material
Source: PubMed Central journal article supplement (PMC3079541)

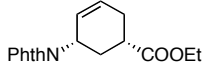

13

STANDARD PROTON PARAMETERS  
 Pulse sequence: zgpg30  
 Solvent: CDCl3  
 INOVA-500 "outseq"  
 Pulse: 56.2 degrees  
 Relax: 4.000 sec  
 Acq. time: 3.500 sec  
 10 F1: 100.625 MHz  
 OBSERVE: H1 500.136288 MHz  
 F2: 100.625 MHz  
 Total time: 1 min, 4 sec

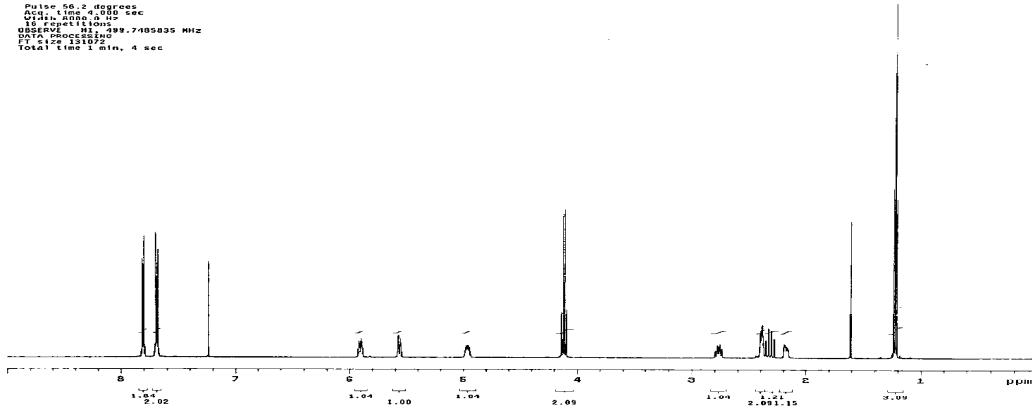

4.22

Cl3ppr  
 Pulse sequence: zgpg30  
 Solvent: CDCl3  
 Relax: 4.000 sec  
 INOVA-500 "outseq"  
 Relax: delay 0.500 sec  
 Pulse: 56.2 degrees  
 Acq. time: 3.500 sec  
 10 F1: 100.625 MHz  
 OBSERVE: H1 500.136288 MHz  
 F2: 100.625 MHz  
 CONTINUOUSLY ON  
 MULTISCAN: 10  
 MVA PROCESSING  
 Line: 100.625 MHz  
 Total time: 54 min, 17 sec

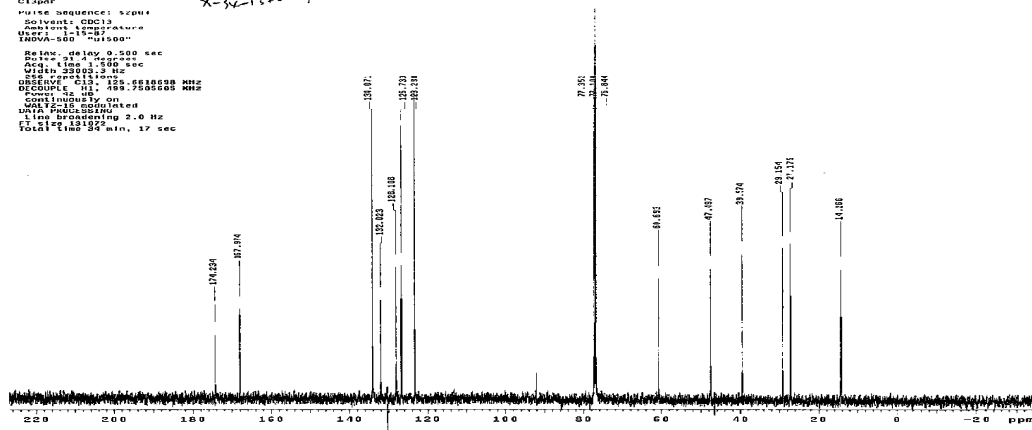

4.22

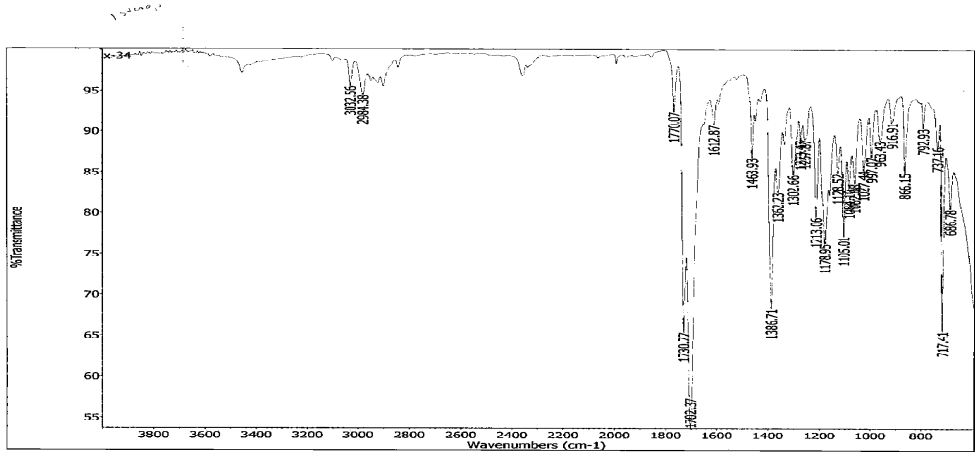

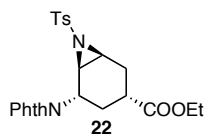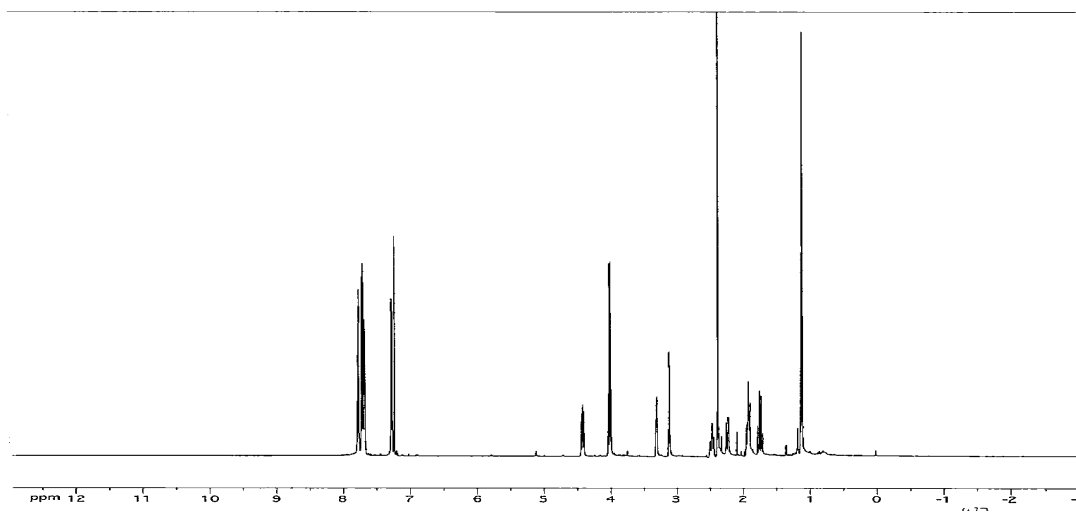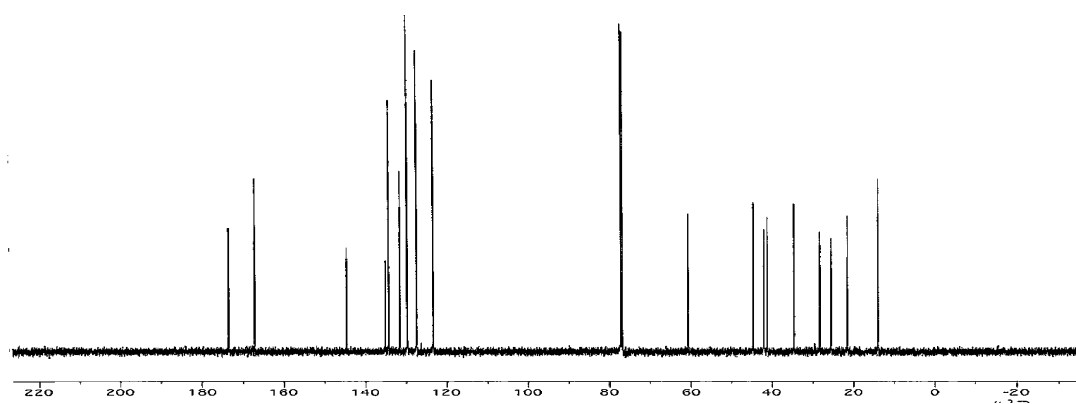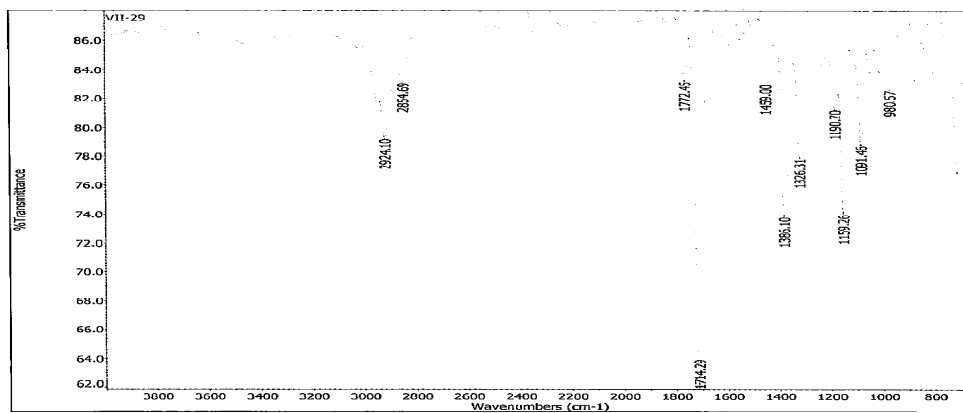



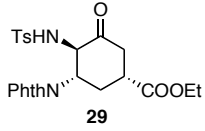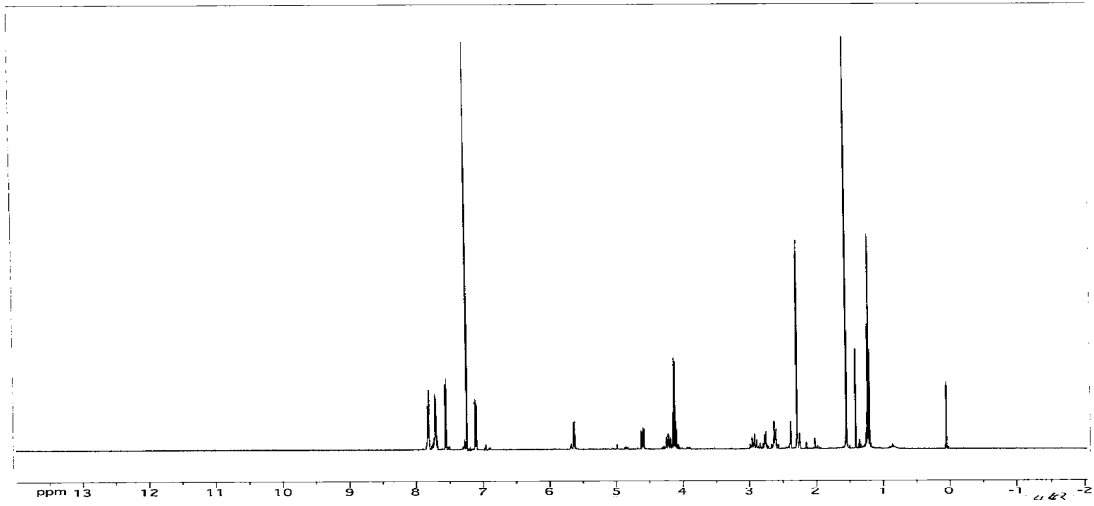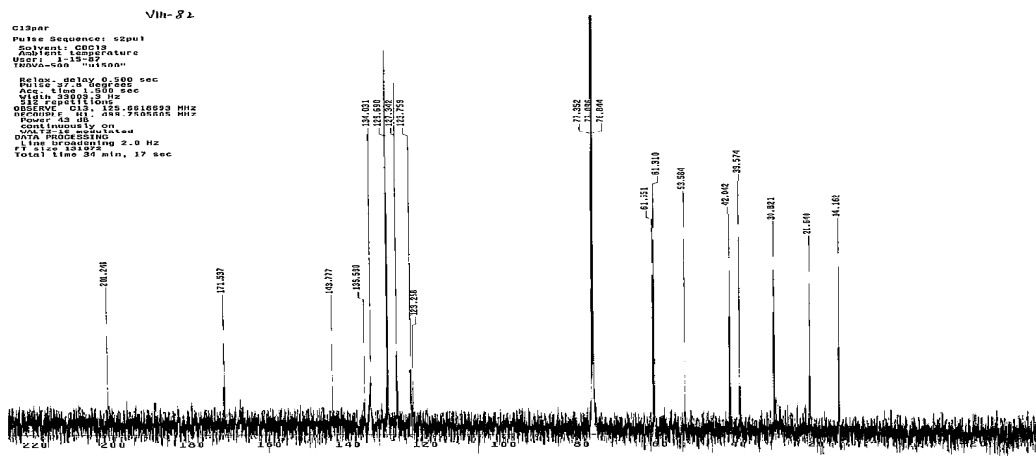

983

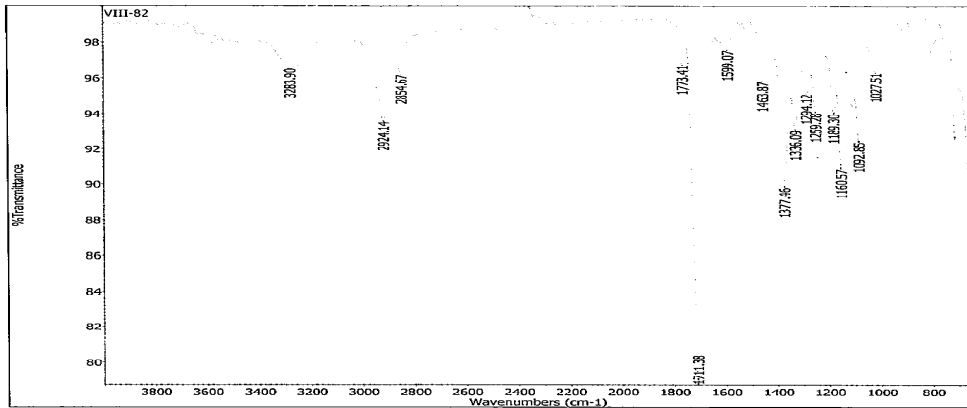

1.2.1

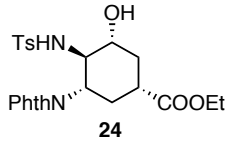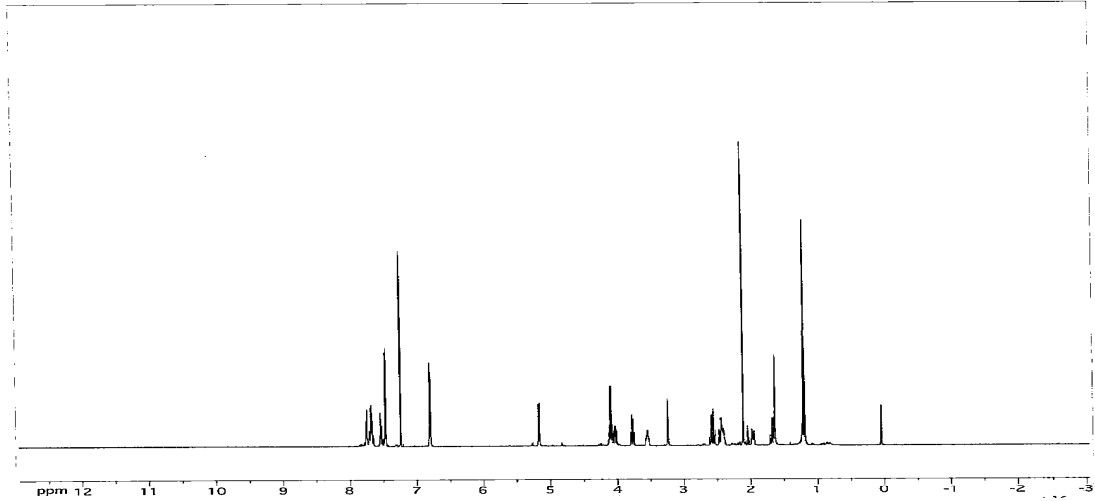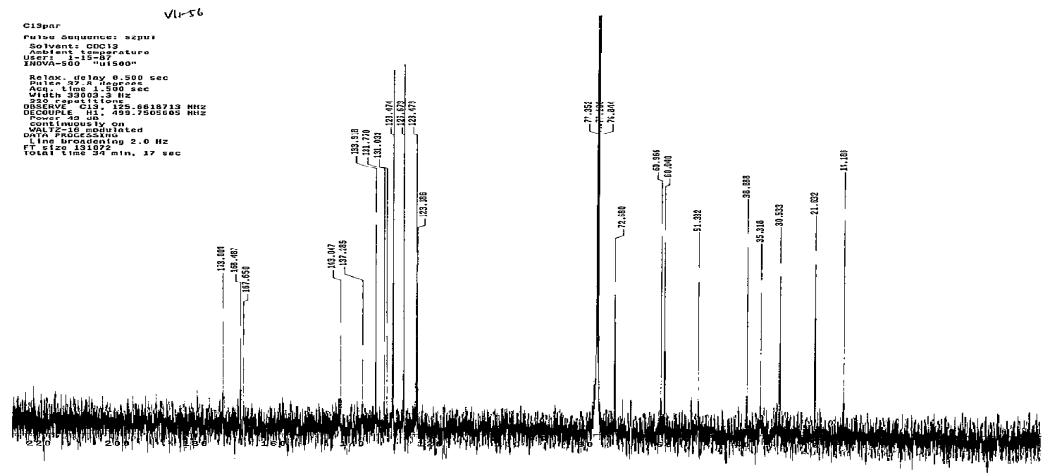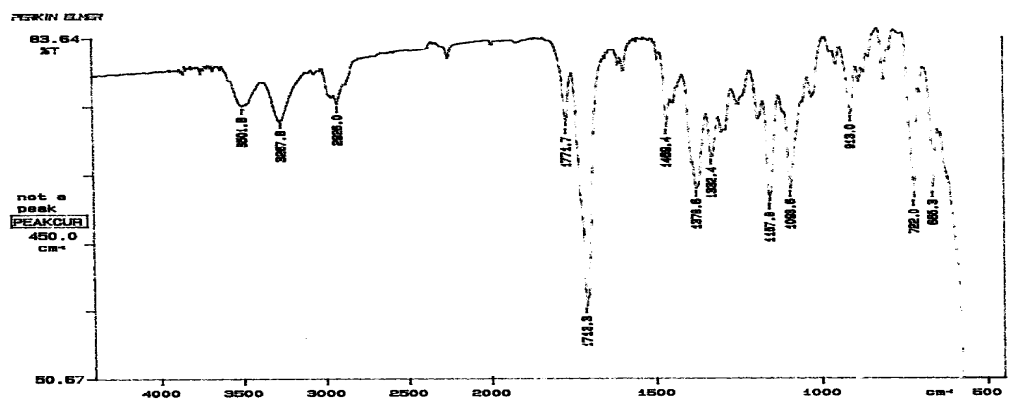

08/12/05 14:28  
 X: 4 scans, 4.0cm-1

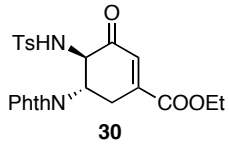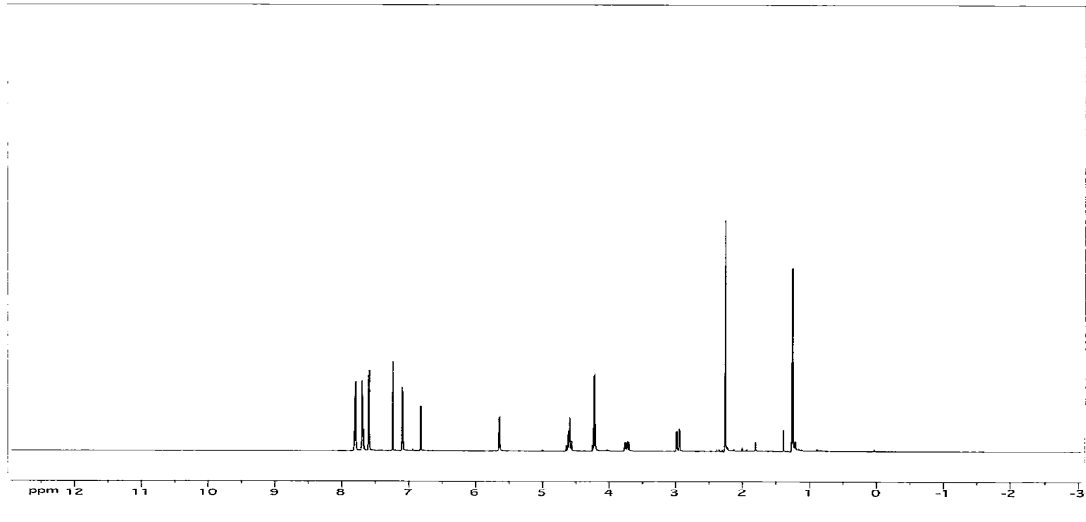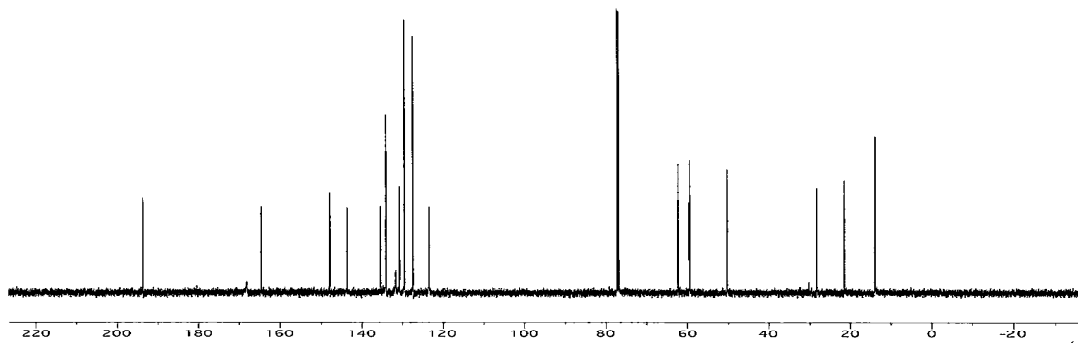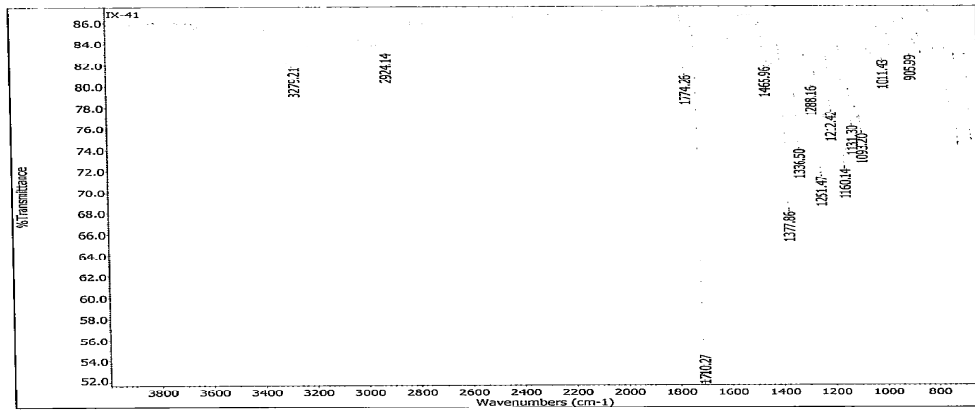

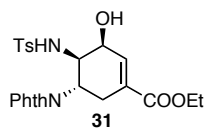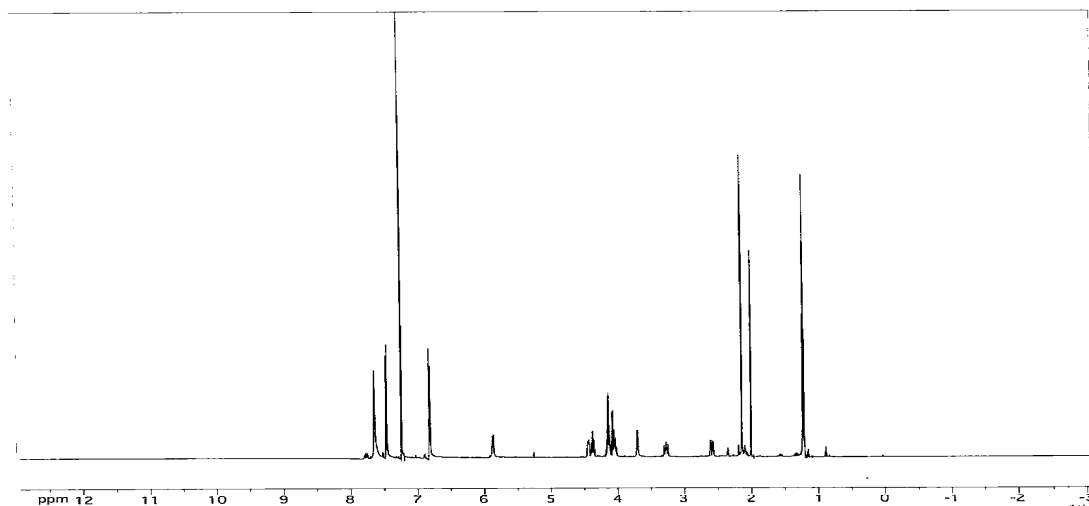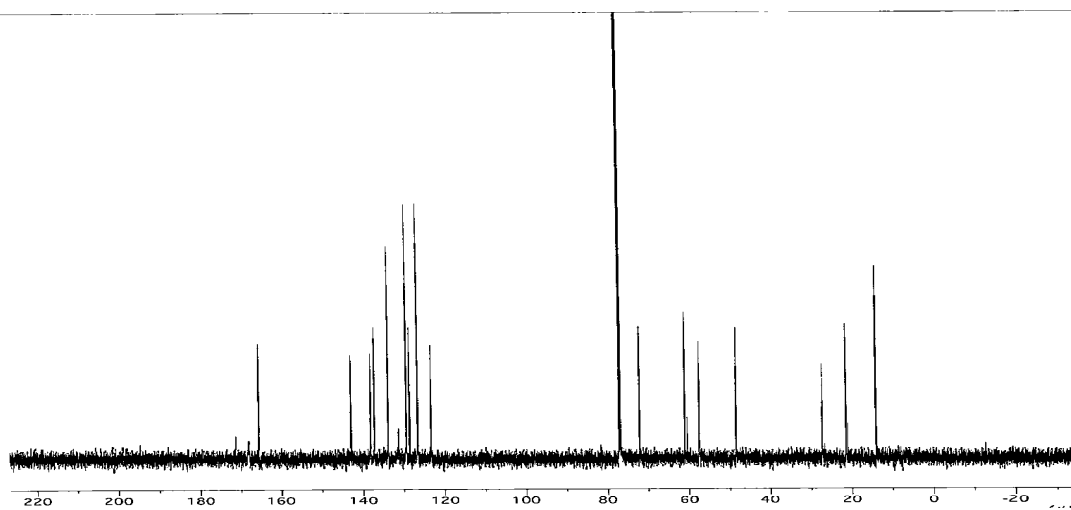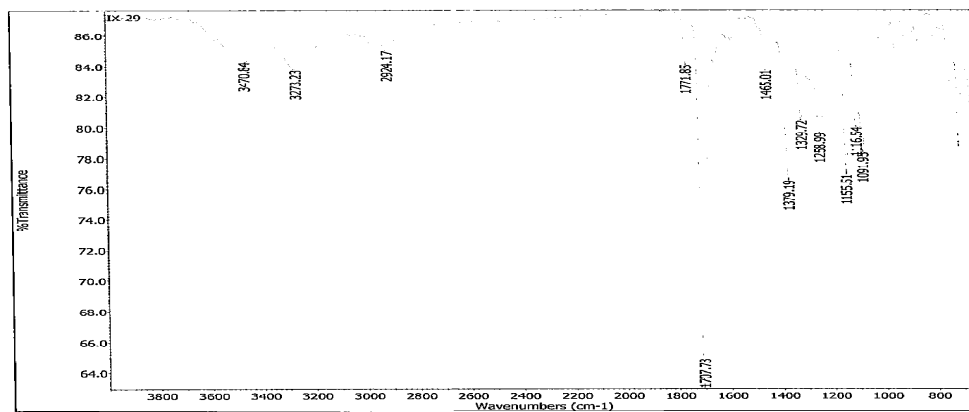



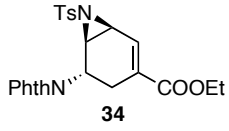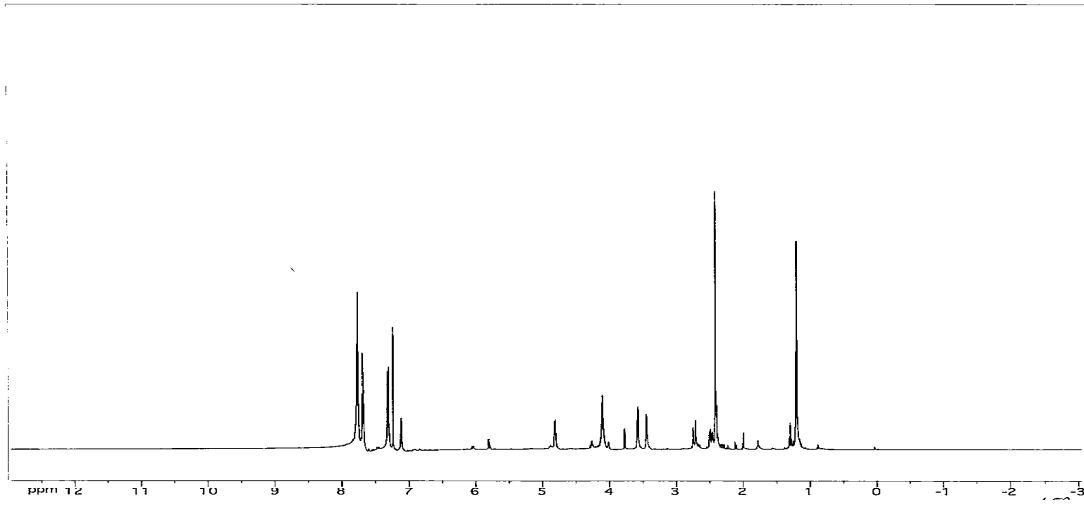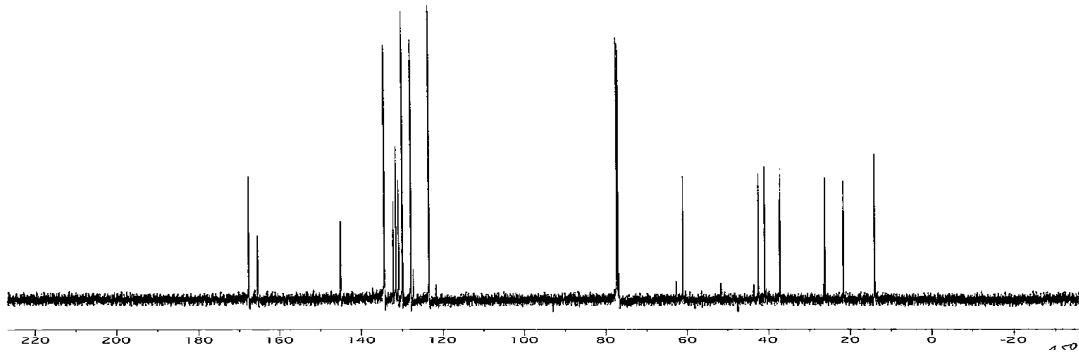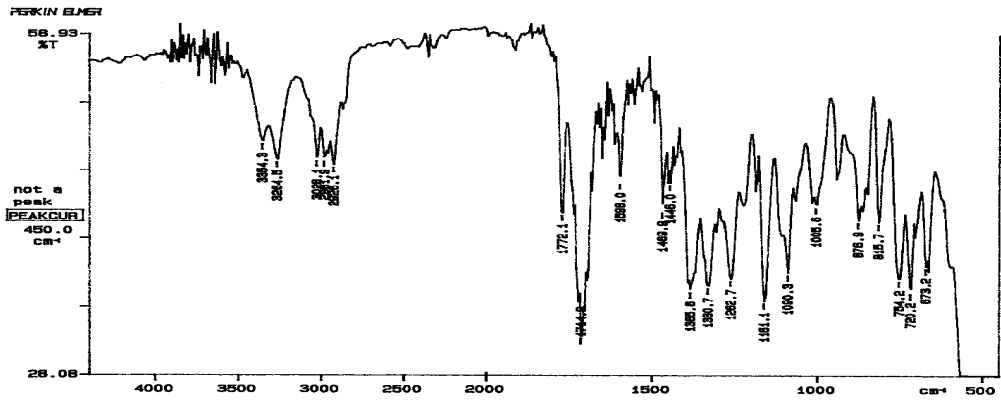

07/02/20 23:14  
 X: 4 scans, 4.0cm<sup>-1</sup>

4.50

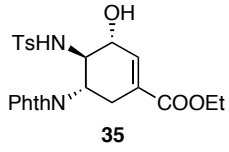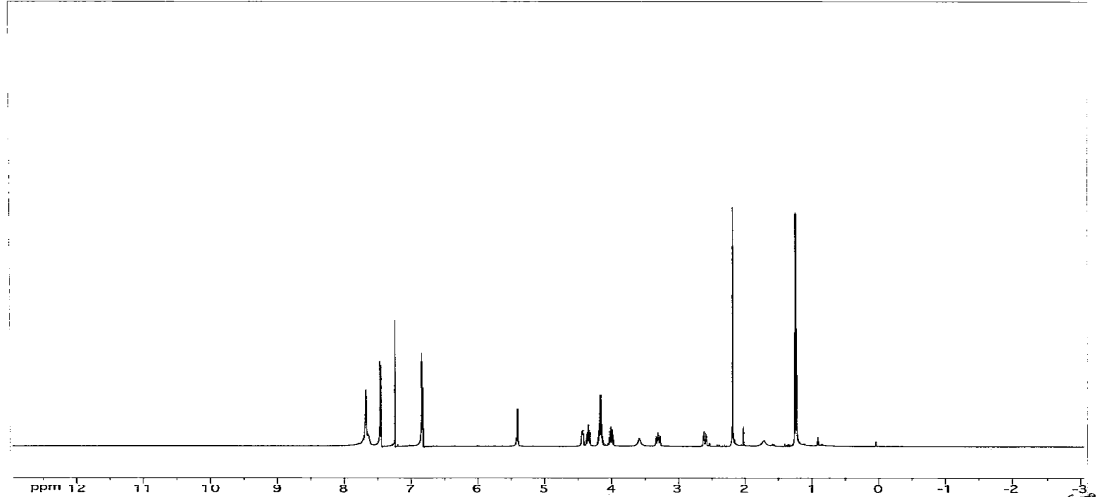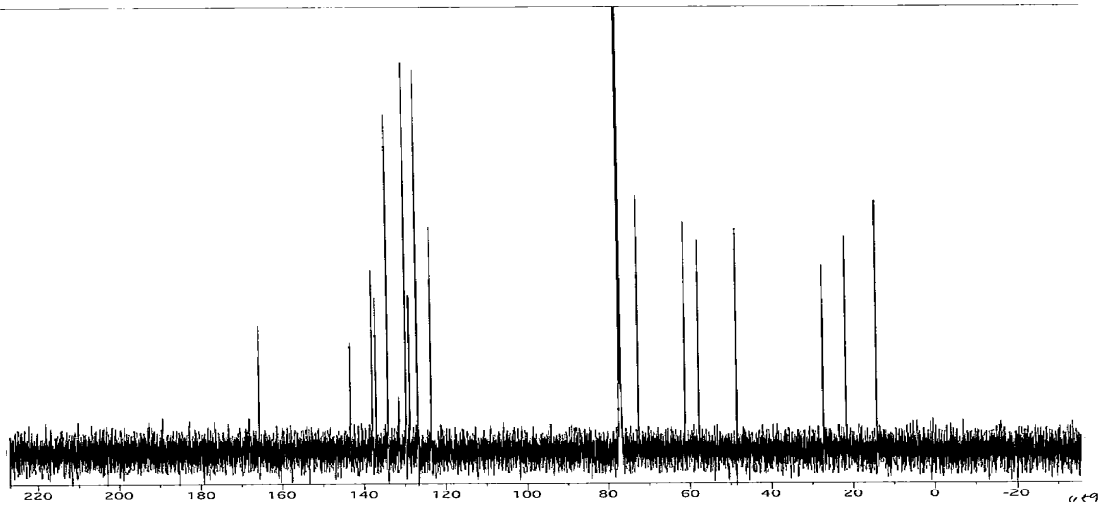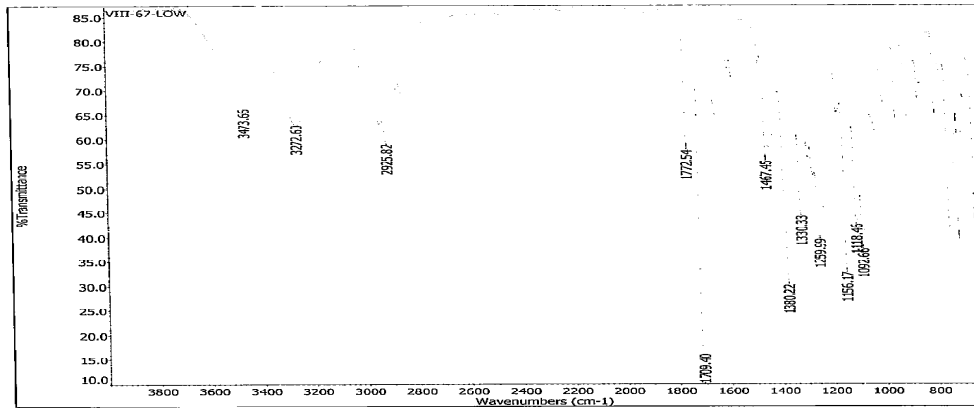

4.19





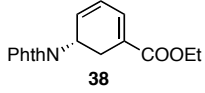

STANDARD PROTON PARAMETERS  
 Pulse Sequence: s2p01  
 Solvent: CDCl3  
 Acquisition Temperature  
 INOVA-500 "nu1500"  
 Pulse: 56.2 degrees  
 Delay: 4.000 sec  
 Width: 12.000 Hz  
 Decouple: 11.000 Hz  
 Frequency: 125.760333 MHz  
 Data Processing: 2.0 Hz  
 Total Time 17 min. 8 sec

x 63 - x 4.5 C

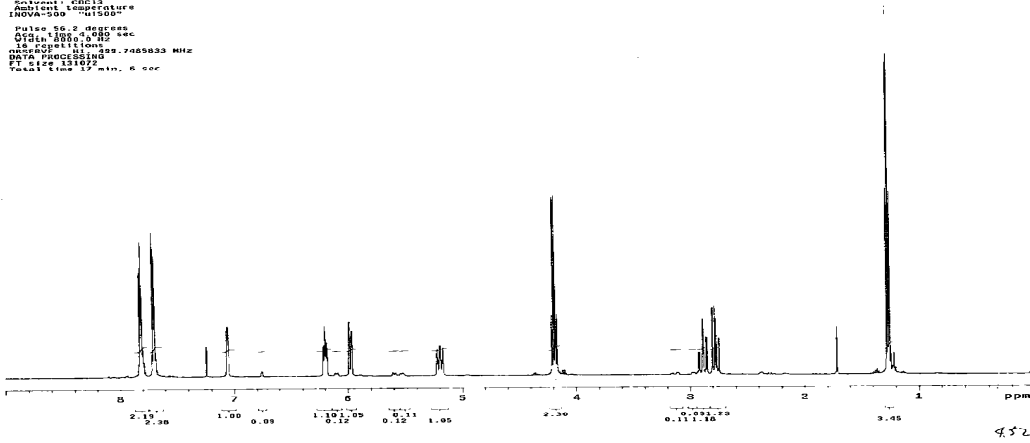

4.52

C13par  
 Pulse sequence: s2p01  
 Solvent: CDCl3  
 Acquisition Temperature  
 INOVA-500 "nu1500"  
 Pulse: 45.000 sec  
 Delay: 4.000 sec  
 Width: 12.000 Hz  
 Decouple: 11.000 Hz  
 Frequency: 125.760333 MHz  
 Data Processing: 2.0 Hz  
 Total Time 56 min. 17 sec

x 63 - x 1.5 C

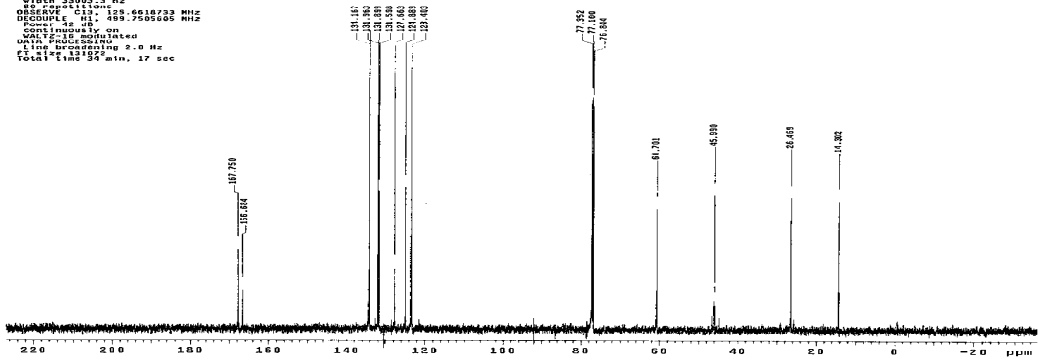

4.52

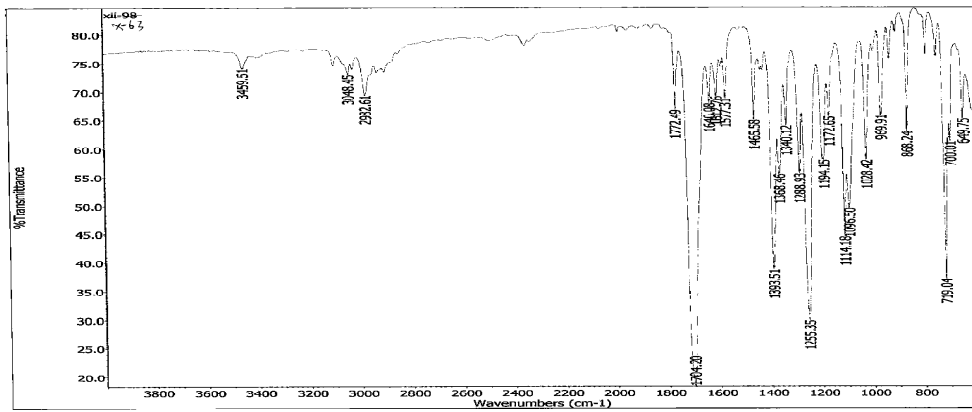

4.52

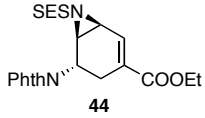

STANDARD PROTON PARAMETERS  
 Pulse Sequence: s2pu1  
 Solvent: CDCl3  
 INOVA-500  
 P1: 12.00  
 P2: 12.00  
 P3: 12.00  
 P4: 12.00  
 P5: 12.00  
 P6: 12.00  
 P7: 12.00  
 P8: 12.00  
 P9: 12.00  
 P10: 12.00  
 P11: 12.00  
 P12: 12.00  
 P13: 12.00  
 P14: 12.00  
 P15: 12.00  
 P16: 12.00  
 P17: 12.00  
 P18: 12.00  
 P19: 12.00  
 P20: 12.00  
 P21: 12.00  
 P22: 12.00  
 P23: 12.00  
 P24: 12.00  
 P25: 12.00  
 P26: 12.00  
 P27: 12.00  
 P28: 12.00  
 P29: 12.00  
 P30: 12.00  
 P31: 12.00  
 P32: 12.00  
 P33: 12.00  
 P34: 12.00  
 P35: 12.00  
 P36: 12.00  
 P37: 12.00  
 P38: 12.00  
 P39: 12.00  
 P40: 12.00  
 P41: 12.00  
 P42: 12.00  
 P43: 12.00  
 P44: 12.00  
 P45: 12.00  
 P46: 12.00  
 P47: 12.00  
 P48: 12.00  
 P49: 12.00  
 P50: 12.00  
 P51: 12.00  
 P52: 12.00  
 P53: 12.00  
 P54: 12.00  
 P55: 12.00  
 P56: 12.00  
 P57: 12.00  
 P58: 12.00  
 P59: 12.00  
 P60: 12.00  
 P61: 12.00  
 P62: 12.00  
 P63: 12.00  
 P64: 12.00  
 P65: 12.00  
 P66: 12.00  
 P67: 12.00  
 P68: 12.00  
 P69: 12.00  
 P70: 12.00  
 P71: 12.00  
 P72: 12.00  
 P73: 12.00  
 P74: 12.00  
 P75: 12.00  
 P76: 12.00  
 P77: 12.00  
 P78: 12.00  
 P79: 12.00  
 P80: 12.00  
 P81: 12.00  
 P82: 12.00  
 P83: 12.00  
 P84: 12.00  
 P85: 12.00  
 P86: 12.00  
 P87: 12.00  
 P88: 12.00  
 P89: 12.00  
 P90: 12.00  
 P91: 12.00  
 P92: 12.00  
 P93: 12.00  
 P94: 12.00  
 P95: 12.00  
 P96: 12.00  
 P97: 12.00  
 P98: 12.00  
 P99: 12.00  
 P100: 12.00  
 Total time 1 min, 4 sec

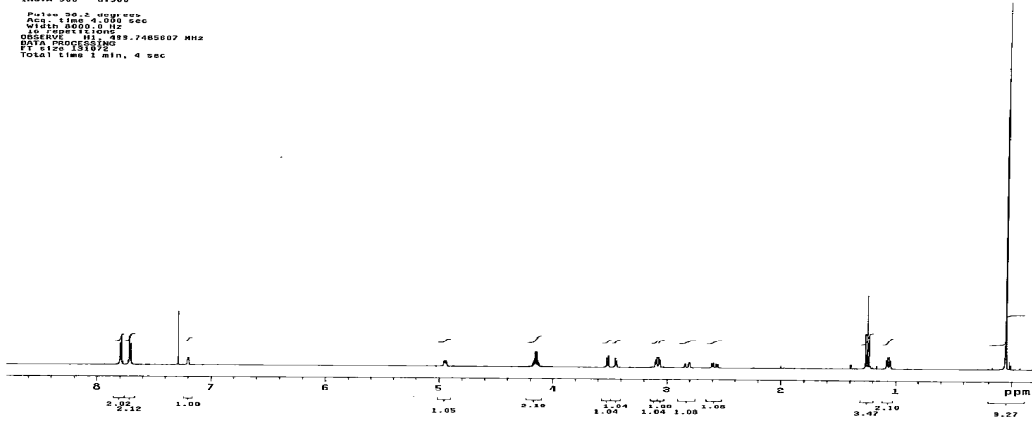

C13pqr  
 Pulse Sequence: s2pu1  
 Solvent: CDCl3  
 Analysis Temperature: 30.00  
 USG2: 15-07  
 INOVA-500  
 Relax delay: 0.500 sec  
 P1: 12.00  
 P2: 12.00  
 P3: 12.00  
 P4: 12.00  
 P5: 12.00  
 P6: 12.00  
 P7: 12.00  
 P8: 12.00  
 P9: 12.00  
 P10: 12.00  
 P11: 12.00  
 P12: 12.00  
 P13: 12.00  
 P14: 12.00  
 P15: 12.00  
 P16: 12.00  
 P17: 12.00  
 P18: 12.00  
 P19: 12.00  
 P20: 12.00  
 P21: 12.00  
 P22: 12.00  
 P23: 12.00  
 P24: 12.00  
 P25: 12.00  
 P26: 12.00  
 P27: 12.00  
 P28: 12.00  
 P29: 12.00  
 P30: 12.00  
 P31: 12.00  
 P32: 12.00  
 P33: 12.00  
 P34: 12.00  
 P35: 12.00  
 P36: 12.00  
 P37: 12.00  
 P38: 12.00  
 P39: 12.00  
 P40: 12.00  
 P41: 12.00  
 P42: 12.00  
 P43: 12.00  
 P44: 12.00  
 P45: 12.00  
 P46: 12.00  
 P47: 12.00  
 P48: 12.00  
 P49: 12.00  
 P50: 12.00  
 P51: 12.00  
 P52: 12.00  
 P53: 12.00  
 P54: 12.00  
 P55: 12.00  
 P56: 12.00  
 P57: 12.00  
 P58: 12.00  
 P59: 12.00  
 P60: 12.00  
 P61: 12.00  
 P62: 12.00  
 P63: 12.00  
 P64: 12.00  
 P65: 12.00  
 P66: 12.00  
 P67: 12.00  
 P68: 12.00  
 P69: 12.00  
 P70: 12.00  
 P71: 12.00  
 P72: 12.00  
 P73: 12.00  
 P74: 12.00  
 P75: 12.00  
 P76: 12.00  
 P77: 12.00  
 P78: 12.00  
 P79: 12.00  
 P80: 12.00  
 P81: 12.00  
 P82: 12.00  
 P83: 12.00  
 P84: 12.00  
 P85: 12.00  
 P86: 12.00  
 P87: 12.00  
 P88: 12.00  
 P89: 12.00  
 P90: 12.00  
 P91: 12.00  
 P92: 12.00  
 P93: 12.00  
 P94: 12.00  
 P95: 12.00  
 P96: 12.00  
 P97: 12.00  
 P98: 12.00  
 P99: 12.00  
 P100: 12.00  
 Total time 34 min, 17 sec

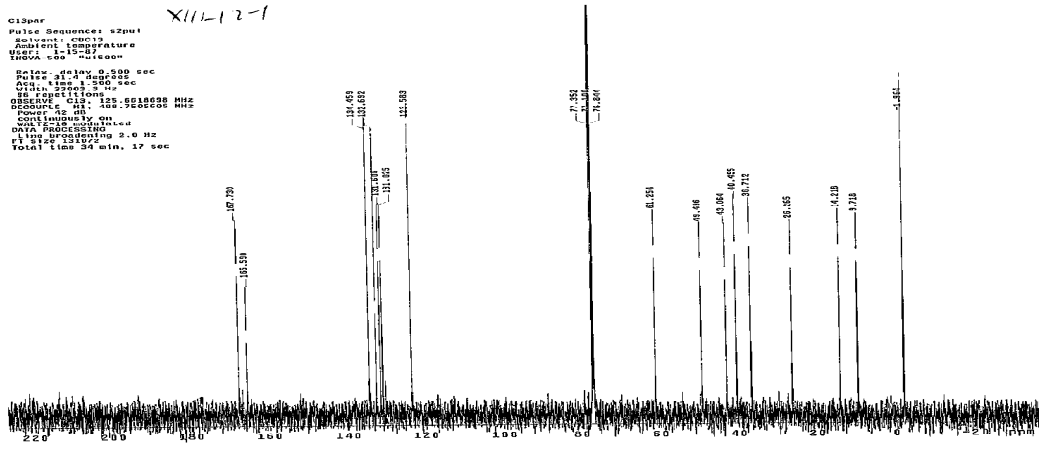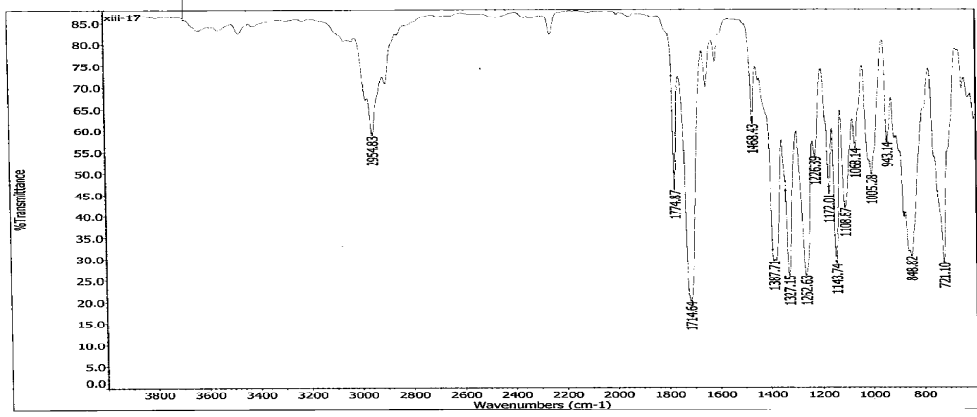

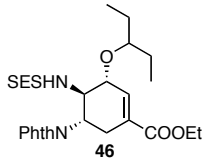

STANDARD PROTON PARAMETERS xii-2 ✓  
 Pulse Sequence: s2pul  
 Solvent: CDCl3  
 Ambient Temperature: 30.0  
 INOVA-500  
 Pulse: 50.2 4000000  
 Q1: 1.000 4.000 sec  
 Q2: 1.000 4.000 sec  
 IS: 200000000 2486335 MHz  
 DATA PROCESSING: 4000000  
 P1: 1.00 15.000 sec  
 Total time: 1 min, 4 sec

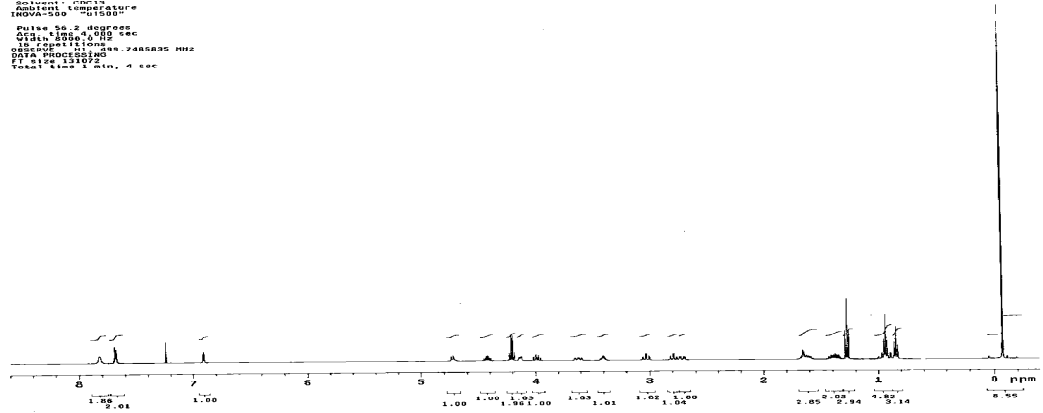

C13par xii-2 ✓  
 Pulse Sequence: s2pul  
 Solvent: CDCl3  
 Ambient Temperature: 30.0  
 INOVA-500  
 Pulse: 40.0 101.500 sec  
 Q1: 1.000 4.000 sec  
 Q2: 1.000 4.000 sec  
 IS: 200000000 6616698 MHz  
 RESOLVE: 130 1.000 sec  
 P1: 1.00 15.000 sec  
 P2: 1.00 15.000 sec  
 DATA PROCESSING: 4000000  
 P1: 1.00 15.000 sec  
 Total time: 58 min, 17 sec

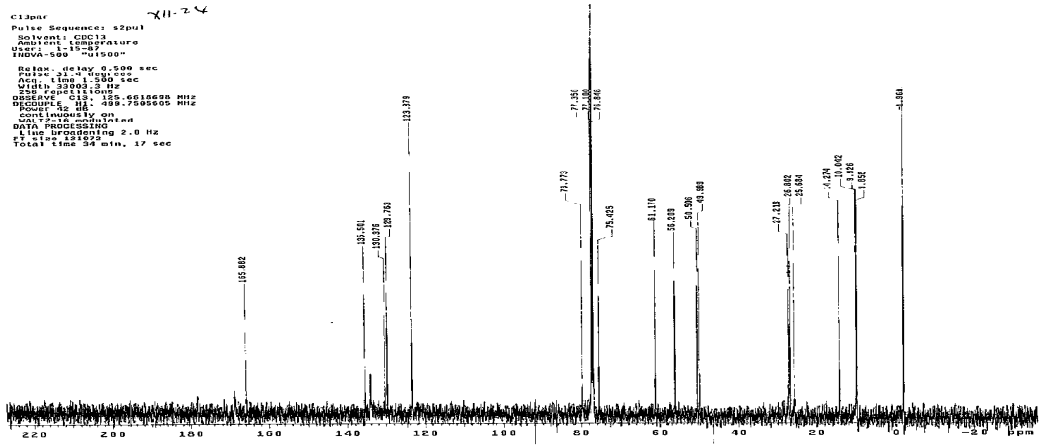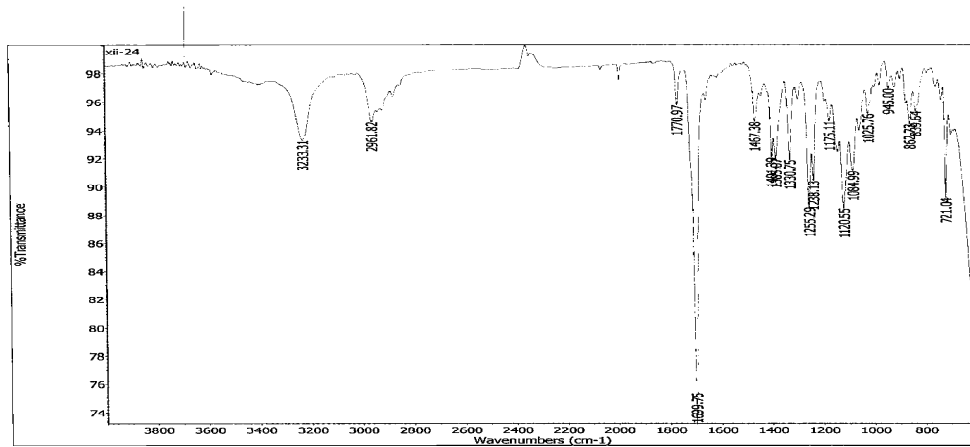

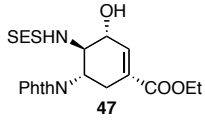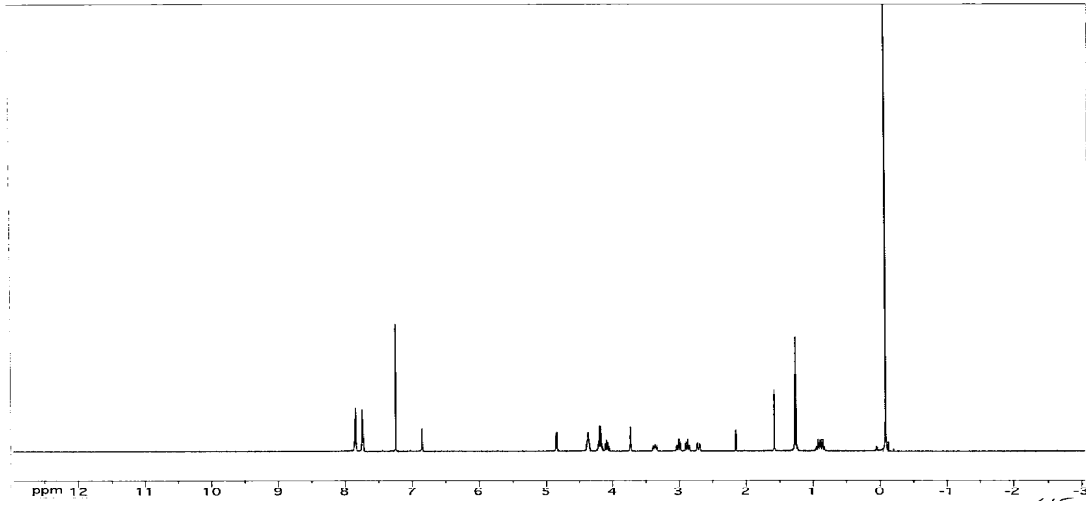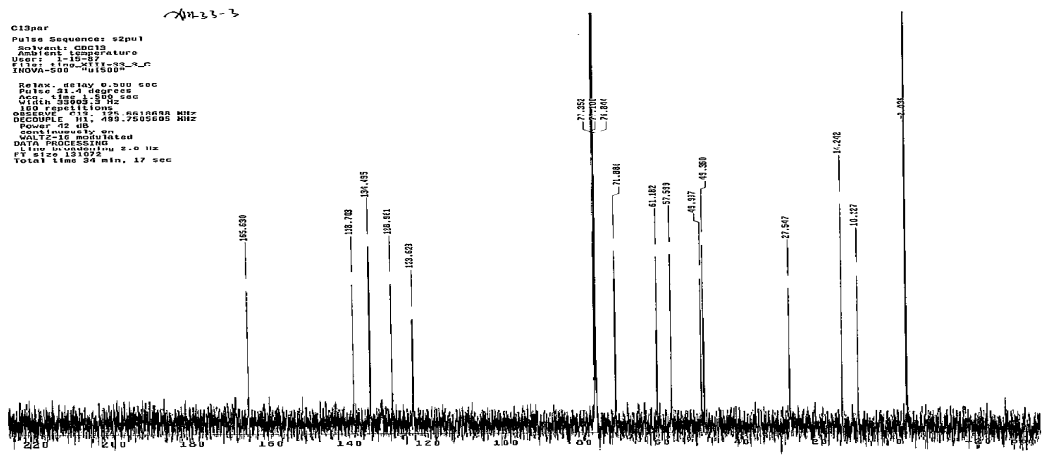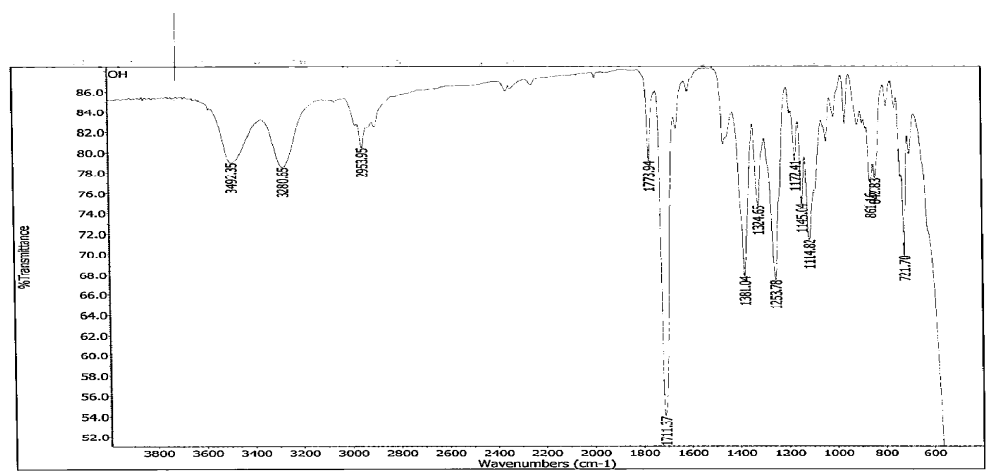



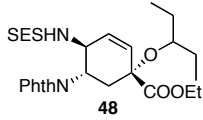

STANDARD PROTON PARAMETERS  
 Pulse Sequence: s2pul  
 Solvent: CDCl3  
 Acquisition Temperature:  
 INOVA-500 "015000"  
 Pulse: 16.20 degrees  
 Q1: 100.624 0.00 sec  
 S: 15.00000000  
 DATA PROCESSING  
 F1: 125.6130722 MHz  
 F2: 125.6130722 MHz  
 Total Time: 1 min, 4 sec

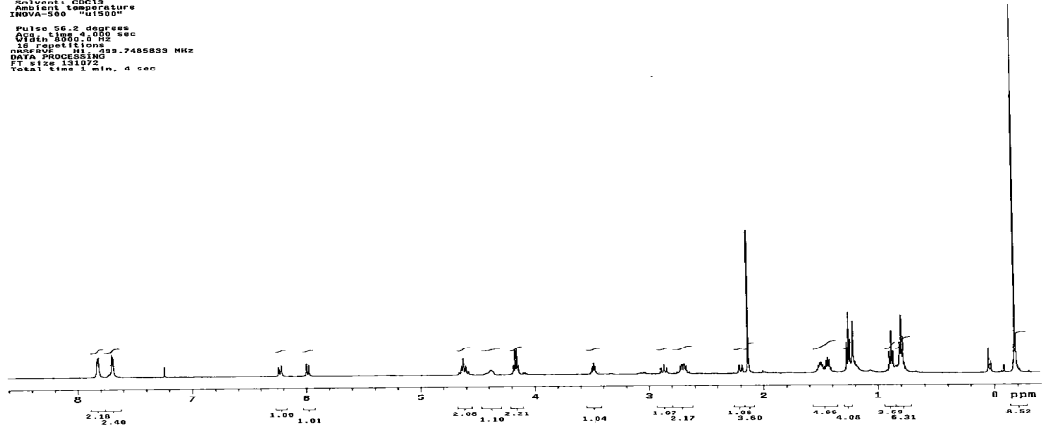

4.66

013par  
 Pulse Sequence: s2pul  
 Solvent: CDCl3  
 Acquisition Temperature:  
 INOVA-500 "015000"  
 Pulse: 16.20 degrees  
 Q1: 100.624 0.00 sec  
 S: 15.00000000  
 DATA PROCESSING  
 F1: 125.6130722 MHz  
 F2: 125.6130722 MHz  
 Total Time: 56 min, 17 sec

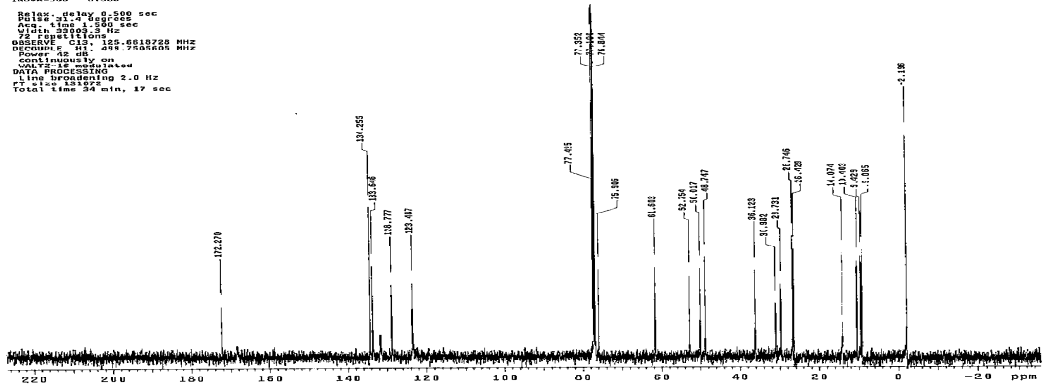

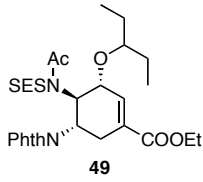

**STANDARD PROTON PARAMETERS**  
 Pulse Sequence: s2pul  
 Solvent: CDCl3  
 Acquisition Temperature: 300.2 K  
 INOVA-500 "h1nuu"  
 Pulse 16.2 degrees  
 Q1: 1.000 sec  
 Q2: 1.000 sec  
 Q3: 1.000 sec  
 Q4: 1.000 sec  
 Q5: 1.000 sec  
 Q6: 1.000 sec  
 Q7: 1.000 sec  
 Q8: 1.000 sec  
 Q9: 1.000 sec  
 Q10: 1.000 sec  
 Q11: 1.000 sec  
 Q12: 1.000 sec  
 Q13: 1.000 sec  
 Q14: 1.000 sec  
 Q15: 1.000 sec  
 Q16: 1.000 sec  
 Q17: 1.000 sec  
 Q18: 1.000 sec  
 Q19: 1.000 sec  
 Q20: 1.000 sec  
 Q21: 1.000 sec  
 Q22: 1.000 sec  
 Q23: 1.000 sec  
 Q24: 1.000 sec  
 Q25: 1.000 sec  
 Q26: 1.000 sec  
 Q27: 1.000 sec  
 Q28: 1.000 sec  
 Q29: 1.000 sec  
 Q30: 1.000 sec  
 Q31: 1.000 sec  
 Q32: 1.000 sec  
 Q33: 1.000 sec  
 Q34: 1.000 sec  
 Q35: 1.000 sec  
 Q36: 1.000 sec  
 Q37: 1.000 sec  
 Q38: 1.000 sec  
 Q39: 1.000 sec  
 Q40: 1.000 sec  
 Q41: 1.000 sec  
 Q42: 1.000 sec  
 Q43: 1.000 sec  
 Q44: 1.000 sec  
 Q45: 1.000 sec  
 Q46: 1.000 sec  
 Q47: 1.000 sec  
 Q48: 1.000 sec  
 Q49: 1.000 sec  
 Q50: 1.000 sec  
 Q51: 1.000 sec  
 Q52: 1.000 sec  
 Q53: 1.000 sec  
 Q54: 1.000 sec  
 Q55: 1.000 sec  
 Q56: 1.000 sec  
 Q57: 1.000 sec  
 Q58: 1.000 sec  
 Q59: 1.000 sec  
 Q60: 1.000 sec  
 Q61: 1.000 sec  
 Q62: 1.000 sec  
 Q63: 1.000 sec  
 Q64: 1.000 sec  
 Q65: 1.000 sec  
 Q66: 1.000 sec  
 Q67: 1.000 sec  
 Q68: 1.000 sec  
 Q69: 1.000 sec  
 Q70: 1.000 sec  
 Q71: 1.000 sec  
 Q72: 1.000 sec  
 Q73: 1.000 sec  
 Q74: 1.000 sec  
 Q75: 1.000 sec  
 Q76: 1.000 sec  
 Q77: 1.000 sec  
 Q78: 1.000 sec  
 Q79: 1.000 sec  
 Q80: 1.000 sec  
 Q81: 1.000 sec  
 Q82: 1.000 sec  
 Q83: 1.000 sec  
 Q84: 1.000 sec  
 Q85: 1.000 sec  
 Q86: 1.000 sec  
 Q87: 1.000 sec  
 Q88: 1.000 sec  
 Q89: 1.000 sec  
 Q90: 1.000 sec  
 Q91: 1.000 sec  
 Q92: 1.000 sec  
 Q93: 1.000 sec  
 Q94: 1.000 sec  
 Q95: 1.000 sec  
 Q96: 1.000 sec  
 Q97: 1.000 sec  
 Q98: 1.000 sec  
 Q99: 1.000 sec  
 Q100: 1.000 sec  
 Total Time 1 min. 4 sec

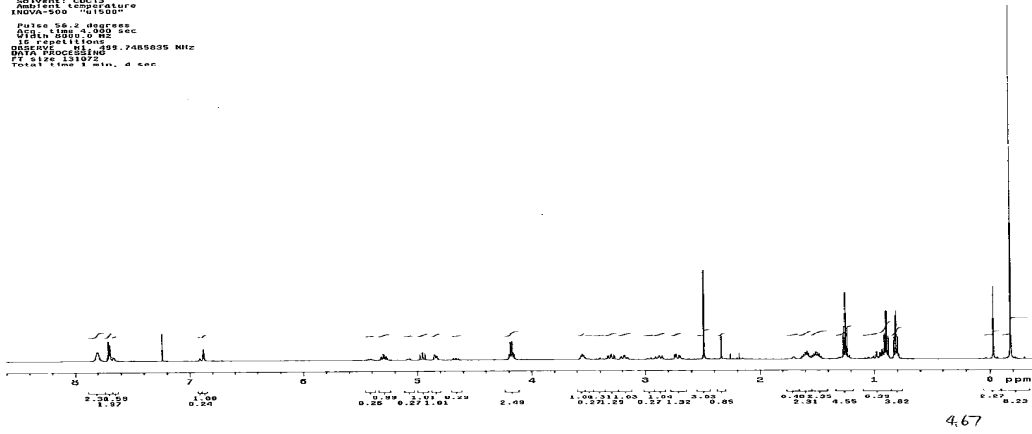

**C13pmr**  
 Pulse Sequence: s2pul  
 Solvent: CDCl3  
 Acquisition Temperature: 300.2 K  
 INOVA-500 "h1nuu"  
 Pulse 16.2 degrees  
 Q1: 1.000 sec  
 Q2: 1.000 sec  
 Q3: 1.000 sec  
 Q4: 1.000 sec  
 Q5: 1.000 sec  
 Q6: 1.000 sec  
 Q7: 1.000 sec  
 Q8: 1.000 sec  
 Q9: 1.000 sec  
 Q10: 1.000 sec  
 Q11: 1.000 sec  
 Q12: 1.000 sec  
 Q13: 1.000 sec  
 Q14: 1.000 sec  
 Q15: 1.000 sec  
 Q16: 1.000 sec  
 Q17: 1.000 sec  
 Q18: 1.000 sec  
 Q19: 1.000 sec  
 Q20: 1.000 sec  
 Q21: 1.000 sec  
 Q22: 1.000 sec  
 Q23: 1.000 sec  
 Q24: 1.000 sec  
 Q25: 1.000 sec  
 Q26: 1.000 sec  
 Q27: 1.000 sec  
 Q28: 1.000 sec  
 Q29: 1.000 sec  
 Q30: 1.000 sec  
 Q31: 1.000 sec  
 Q32: 1.000 sec  
 Q33: 1.000 sec  
 Q34: 1.000 sec  
 Q35: 1.000 sec  
 Q36: 1.000 sec  
 Q37: 1.000 sec  
 Q38: 1.000 sec  
 Q39: 1.000 sec  
 Q40: 1.000 sec  
 Q41: 1.000 sec  
 Q42: 1.000 sec  
 Q43: 1.000 sec  
 Q44: 1.000 sec  
 Q45: 1.000 sec  
 Q46: 1.000 sec  
 Q47: 1.000 sec  
 Q48: 1.000 sec  
 Q49: 1.000 sec  
 Q50: 1.000 sec  
 Q51: 1.000 sec  
 Q52: 1.000 sec  
 Q53: 1.000 sec  
 Q54: 1.000 sec  
 Q55: 1.000 sec  
 Q56: 1.000 sec  
 Q57: 1.000 sec  
 Q58: 1.000 sec  
 Q59: 1.000 sec  
 Q60: 1.000 sec  
 Q61: 1.000 sec  
 Q62: 1.000 sec  
 Q63: 1.000 sec  
 Q64: 1.000 sec  
 Q65: 1.000 sec  
 Q66: 1.000 sec  
 Q67: 1.000 sec  
 Q68: 1.000 sec  
 Q69: 1.000 sec  
 Q70: 1.000 sec  
 Q71: 1.000 sec  
 Q72: 1.000 sec  
 Q73: 1.000 sec  
 Q74: 1.000 sec  
 Q75: 1.000 sec  
 Q76: 1.000 sec  
 Q77: 1.000 sec  
 Q78: 1.000 sec  
 Q79: 1.000 sec  
 Q80: 1.000 sec  
 Q81: 1.000 sec  
 Q82: 1.000 sec  
 Q83: 1.000 sec  
 Q84: 1.000 sec  
 Q85: 1.000 sec  
 Q86: 1.000 sec  
 Q87: 1.000 sec  
 Q88: 1.000 sec  
 Q89: 1.000 sec  
 Q90: 1.000 sec  
 Q91: 1.000 sec  
 Q92: 1.000 sec  
 Q93: 1.000 sec  
 Q94: 1.000 sec  
 Q95: 1.000 sec  
 Q96: 1.000 sec  
 Q97: 1.000 sec  
 Q98: 1.000 sec  
 Q99: 1.000 sec  
 Q100: 1.000 sec  
 Total Time 54 min. 17 sec

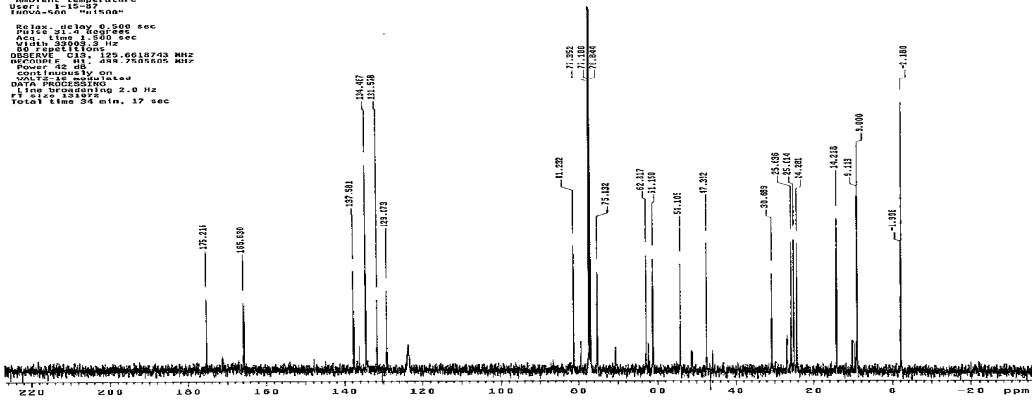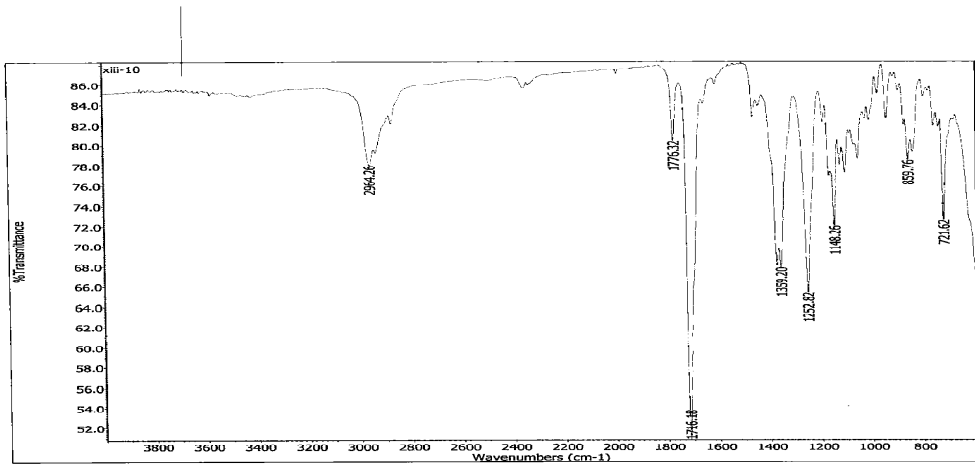

Supplement: NIHMS264460-supplement-Spectra.pdf [file NIHMS264460-supplement-Spectra.pdf]
